# Supplementary material
Source: MDPI journal article supplement (https://www.mdpi.com/1424-2818/10/4/107)
Supplement: s1 [file s1]

[illegible]

|                                                               |       |       |       |        |       |       |       |       |       |
|---------------------------------------------------------------|-------|-------|-------|--------|-------|-------|-------|-------|-------|
| <i>Juncaceicola achilleae</i> (KX449525)                      |       |       |       |        |       |       |       |       |       |
| <i>Juncaceicola padellana</i> (NR145138)                      | 0,159 |       |       |        |       |       |       |       |       |
| <i>Juncaceicola alpina</i> (Nr145172) TYPE                    | 0,246 | 0,248 |       |        |       |       |       |       |       |
| <i>Juncaceicola oreochloae</i> (Nr145137) TYPE                | 0,267 | 0,332 | 0,668 |        |       |       |       |       |       |
| <i>Juncaceicola luzulae</i> (KX449529)                        | 1,235 | 4,612 | 5,670 | 11,341 |       |       |       |       |       |
| <i>Juncaceicola dactylidis</i> (KX449527)                     | 0,746 | 1,464 | 1,616 | 1,534  | 3,786 |       |       |       |       |
| <i>Juncaceicola italica</i> (KX500110)                        | 0,765 | 1,413 | 1,546 | 1,464  | 2,970 | 5,068 |       |       |       |
| <i>Juncaceicola typharum</i> (KF251192)                       | 0,540 | 1,217 | 1,424 | 1,265  | 4,135 | 2,304 | 2,053 |       |       |
| <i>Juncaceicola</i> cf. <i>typharum</i> (UNIPAMPA) (MG272499) | 0,701 | 3,074 | 2,053 | 2,568  | 5,578 | 2,243 | 2,076 | 4,088 |       |
| <i>Didymella exigua</i> (MG272499)                            | 1,627 | 2,279 | 1,921 | 2,070  | 1,997 | 1,936 | 1,669 | 2,014 | 2,202 |

**Supplementary Figure S2.** Estimates of Evolutionary Divergence between sequences from *Deschampsia antarctica* endophytic fungus (*Juncaceicola* cf. *typharum*) and other fungal sequences belonging to the *Juncaceicola* genus, following BLAST analysis.. The number of base substitutions per site from between sequences are shown. The analysis involved 10 nucleotide sequences. Codon positions included were 1st+2nd+3rd+Noncoding. All ambiguous positions were removed for each sequence pair. There were a total of 448 positions in the final dataset. Evolutionary analyses were conducted in.
